# Supplementary material for: Three-dimensional coordination polymers constructed from C2-symmetric linkers of pyridyl dicarboxylate ligands
Source: Royal Society of Chemistry journal article supplement (doi:10.1039/c4ra07128j), 2014-01-01
Supplement: c4ra07128j1.pdf [file c4ra07128j1.pdf]

## **Electronic Supplementary Information**

**Three-dimensional coordination polymers constructed from  $C_2$ -  
symmetric linkers of pyridyl dicarboxylate ligands**

## Synthesis of H<sub>2</sub>L<sub>2</sub>

4-(ethoxycarbonyl)phenylboronic acid (4.46 g, 23 mmol), 3,5-Dibromopyridine (2.36g, 10 mmol), and K<sub>2</sub>CO<sub>3</sub> (2.10 g, 10.0 mmol) were added to 1,4-dioxane (30 mL). After stirring, Pd(PPh<sub>3</sub>)<sub>4</sub> (0.05 g, 0.043 mmol) was added, then the mixture was heated to 80 °C for 3 days under N<sub>2</sub>. The resultant was evaporated to dryness and taken up in CH<sub>2</sub>Cl<sub>2</sub> which later had been dried over MgSO<sub>4</sub>. This CH<sub>2</sub>Cl<sub>2</sub> solution was evaporated to dryness and the residue was washed briefly with ethanol (20 mL). The crude product was hydrolyzed by refluxing in 2 M aqueous NaOH followed by acidification with 37% HCl to afford H<sub>2</sub>L<sub>2</sub>. Yield: 2.5 g, 78.3%. <sup>1</sup>H NMR (DMSO-*d*<sub>6</sub>, 500 MHz), H<sub>2</sub>L<sub>2</sub>: 9.03 (d, 2H), 8.51 (s, 1H) 8.09 (s, 2H), 8.08 (s, 2H) 8.04 (s, 2H), 8.02 (s, 2H). Anal. Calcd (Found) for H<sub>2</sub>L<sub>3</sub>, C<sub>19</sub>H<sub>13</sub>O<sub>4</sub>N: C, 71.47 (71.13); N, 4.39 (4.28); H, 4.10 (3.89) %.

**Table S1** Crystallographic data and structural refinement summary for complexes **1** and **2**.

| Complex                                      | <b>1</b>                                                         | <b>2</b>                                                         |
|----------------------------------------------|------------------------------------------------------------------|------------------------------------------------------------------|
| Formula                                      | C <sub>16</sub> H <sub>14</sub> N <sub>2</sub> O <sub>5</sub> Zn | C <sub>22</sub> H <sub>18</sub> N <sub>2</sub> O <sub>5</sub> Zn |
| <i>Mr</i>                                    | 379.66                                                           | 455.75                                                           |
| Crystal system                               | monoclinic                                                       | monoclinic                                                       |
| Space group                                  | P2 <sub>1</sub> /c                                               | P2 <sub>1</sub> /c                                               |
| a, Å                                         | 11.877(2)                                                        | 15.3645(11)                                                      |
| b, Å                                         | 13.855(3)                                                        | 15.1275(11)                                                      |
| c, Å                                         | 13.921(3)                                                        | 8.3110(6)                                                        |
| α, deg                                       | 90                                                               | 90                                                               |
| β, deg                                       | 114.403(2)                                                       | 91.8500(10)                                                      |
| γ, deg                                       | 90                                                               | 90                                                               |
| V (Å <sup>3</sup> )                          | 2086.3(7)                                                        | 1930.7(2)                                                        |
| Z                                            | 4                                                                | 4                                                                |
| Dcalcd (g cm <sup>-3</sup> )                 | 1.209                                                            | 1.568                                                            |
| Absorption coefficient (mm <sup>-1</sup> )   | 1.199                                                            | 1.311                                                            |
| F(000)                                       | 766                                                              | 936                                                              |
| Reflections collected / unique               | 10661 / 3805                                                     | 10927 / 3524                                                     |
| Data / restraints / parameters               | 3805 / 0 / 219                                                   | 3524 / 6 / 274                                                   |
| R <sub>int</sub>                             | 0.0396                                                           | 0.1037                                                           |
| Final R indices [I > 2σ(I)]                  | 0.0311                                                           | 0.0519                                                           |
| Final wR(F <sub>2</sub> ) values [I > 2σ(I)] | 0.0843                                                           | 0.1652                                                           |
| Final R <sub>1</sub> values (all data)       | 0.0371                                                           | 0.0578                                                           |
| Final wR(F <sub>2</sub> ) values (all data)  | 0.0861                                                           | 0.1719                                                           |
| Goodness of fit on F <sub>2</sub>            | 1.023                                                            | 1.029                                                            |

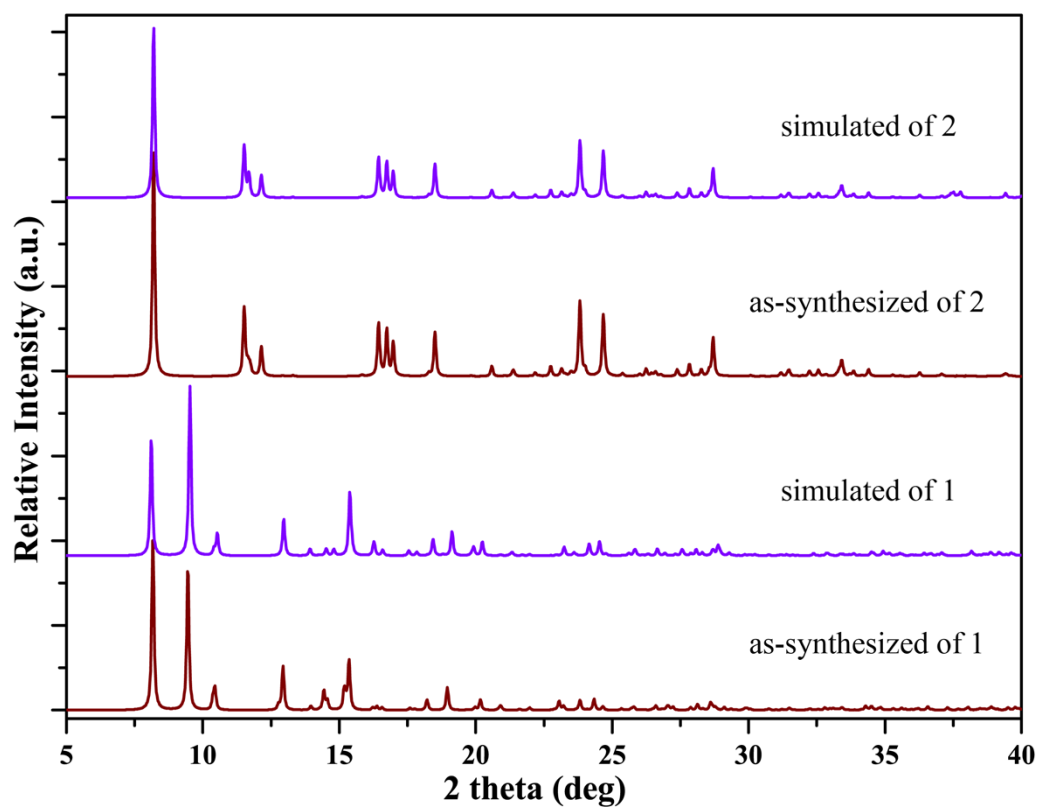

Fig. S1. The as-synthesized and simulated PXRD of 1 and 2.

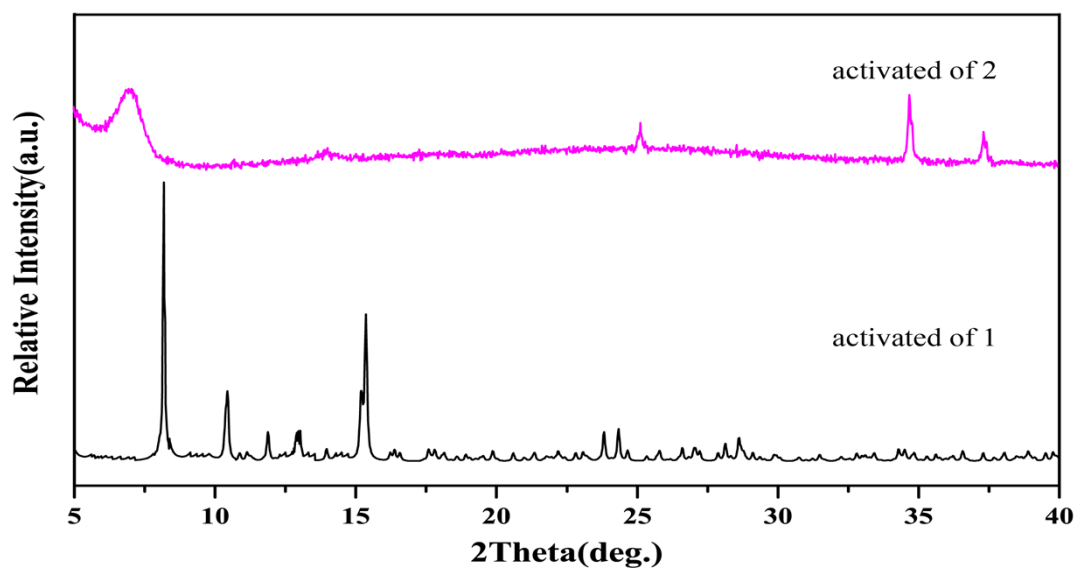

Fig. S2. The PXRD of activated sample of 1 and 2.

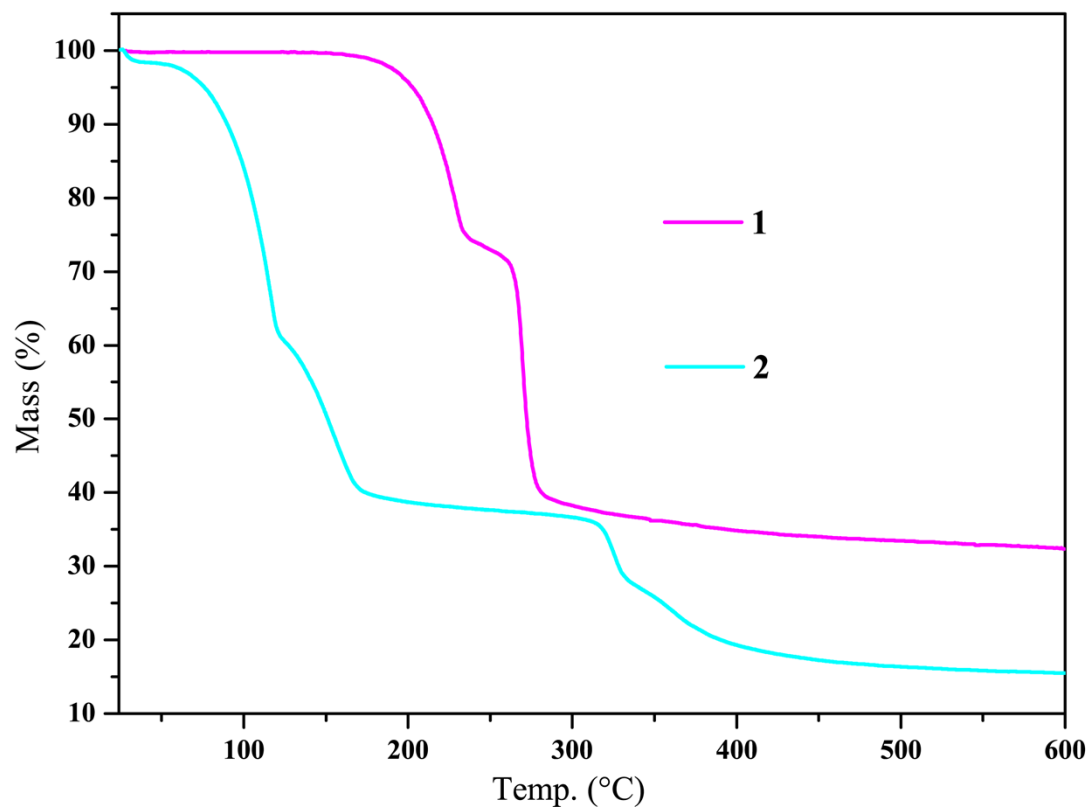

Fig. S3. The TGA curves of **1** and **2**.
